# Supplementary material for: The contributions of normal variation and genetic background to mammalian gene expression
Source: PubMed Central journal article supplement (PMC1557746; doi:10.1186/gb-2006-7-3-r26), 2006-03-31
Supplement: gb-2006-7-3-r26-S2.pdf [file gb-2006-7-3-r26-S2.pdf]

**Supplemental Table 1: Analysis of Variance for the Mixed Effect Model**

| Source of Variation | Deg. of Freedom | Mean Square                                                            | Expected Mean Square                                   |
|---------------------|-----------------|------------------------------------------------------------------------|--------------------------------------------------------|
| Dye                 | 1               | $30 \sum_i (\bar{Y}_{i...} - \bar{Y}_{...})^2$                         | $Q(\text{dye}) + \sigma^2$                             |
| Strain              | 4               | $12 \sum_k (\bar{Y}_{..k.} - \bar{Y}_{...})^2 / 4$                     | $12 \sigma_{strain}^2 + 4 \sigma_{mouse}^2 + \sigma^2$ |
| Mouse               | 10              | $4 \sum_k \sum_j (\bar{Y}_{.jk.} - \bar{Y}_{..k.})^2 / 10$             | $4 \sigma_{mouse}^2 + \sigma^2$                        |
| Error/Residuals     | 44              | $\sum_i \sum_j \sum_k \sum_l (\bar{Y}_{ijkl} - \bar{Y}_{ijk.})^2 / 44$ | $\sigma^2$                                             |

Notation: Let  $Y_{ijkl}$  be the log ratio for the  $ijkl$ th array, where  $i$  indexes the dye ( $i=1,2$ ),  $j$  for mouse ( $j=1,2,3$ ),  $k$  for the strain ( $k=1,2,3,4,5$ ) and  $l$  for the replicate ( $l=1,2$ )

**Supplemental Table 2: Selected genes with variable expression within mouse strains**

| GENE                                                                 | HUGO   | Accession | Fold Difference (q-value) |            |            |            |            |
|----------------------------------------------------------------------|--------|-----------|---------------------------|------------|------------|------------|------------|
|                                                                      |        |           | 129                       | BAL        | CD1        | FVB        | CFW        |
| cytokine inducible SH2-containing suppressor of cytokine signaling 2 | Cish   | AI385595  | 1.3 (0.21)                | 7.9 (0.02) | 3.1 (0.02) | 3.1 (0.03) | 2.3 (0.32) |
| GDP-mannose pyrophosphorylase                                        | Socs2  | AI464459  | 1.7 (0.03)                | 4.0 (0.02) | 1.8 (0.02) | 2.6 (0.03) | 2.2 (0.03) |
| tetratricopeptide repeat domain 7                                    | Gmppb  | AI323895  | 2.2 (0.03)                | 1.9 (0.02) | 1.2 (0.02) | 2.8 (0.03) | 2.6 (0.15) |
| RAB18, member RAS family                                             | Ttc7   | AI415173  | 2.0 (0.04)                | 2.0 (0.03) | 2.3 (0.02) | 2.3 (0.03) | 1.7 (0.11) |
| lymphoid membrane protein                                            | Rab18  | NM_011225 | 4.7 (0.03)                | 1.8 (0.02) | 1.3 (0.06) | 1.3 (0.05) | 1.2 (0.17) |
| arrestin domain containing 3                                         | Lrmp   | NM_008511 | 1.3 (0.08)                | 2.0 (0.02) | 1.9 (0.03) | 2.7 (0.03) | 2.1 (0.03) |
| transferrin receptor                                                 | Arrdc3 | AI450344  | 2.2 (0.03)                | 2.1 (0.02) | 1.8 (0.02) | 2.1 (0.03) | 1.6 (0.03) |
| hematopoietic homeobox                                               | Tfrc   | AI426448  | 2.5 (0.03)                | 1.5 (0.02) | 2.1 (0.00) | 1.9 (0.03) | 1.6 (0.03) |
| vacuolar protein sorting 54                                          | Hhex   | AI450826  | 2.4 (0.03)                | 2.5 (0.02) | 2.1 (0.02) | 1.3 (0.20) | 1.2 (0.03) |
| amiloride-sensitive cation channel                                   | Vps54  | AI452212  | 3.2 (0.03)                | 1.8 (0.02) | 1.9 (0.04) | 1.4 (0.15) | 1.2 (0.06) |
| insulin-like growth factor 2 receptor                                | Accn3  | AI414211  | 1.2 (0.09)                | 1.9 (0.02) | 2.0 (0.02) | 2.3 (0.03) | 1.8 (0.03) |
| immunoglobulin superfamily 7                                         | Igf2r  | U04710    | 1.8 (0.11)                | 1.8 (0.04) | 1.9 (0.08) | 1.6 (0.05) | 1.6 (0.03) |
| delta sleep inducing                                                 | Igsf7  | AI448699  | 1.4 (0.09)                | 1.5 (0.03) | 1.7 (0.04) | 2.1 (0.03) | 1.8 (0.03) |
| bromodomain containing 2                                             | Dsip1  | AI326808  | 1.4 (0.03)                | 2.7 (0.02) | 1.5 (0.02) | 1.6 (0.04) | 1.4 (0.29) |
|                                                                      | Brd2   | AI450617  | 2.7 (0.05)                | 1.8 (0.02) | 1.7 (0.07) | 1.2 (0.24) | 1.2 (0.03) |

Note: This table is a subset of genes that were variable at  $q > 10\%$  in at least 4 out of 5 strains. No ESTs or RIKEN genes were included. Genes expressed at a lower level in liver than in reference RNA were not included. Genes were selected by meeting the above criteria and sorted by average fold difference within strain.

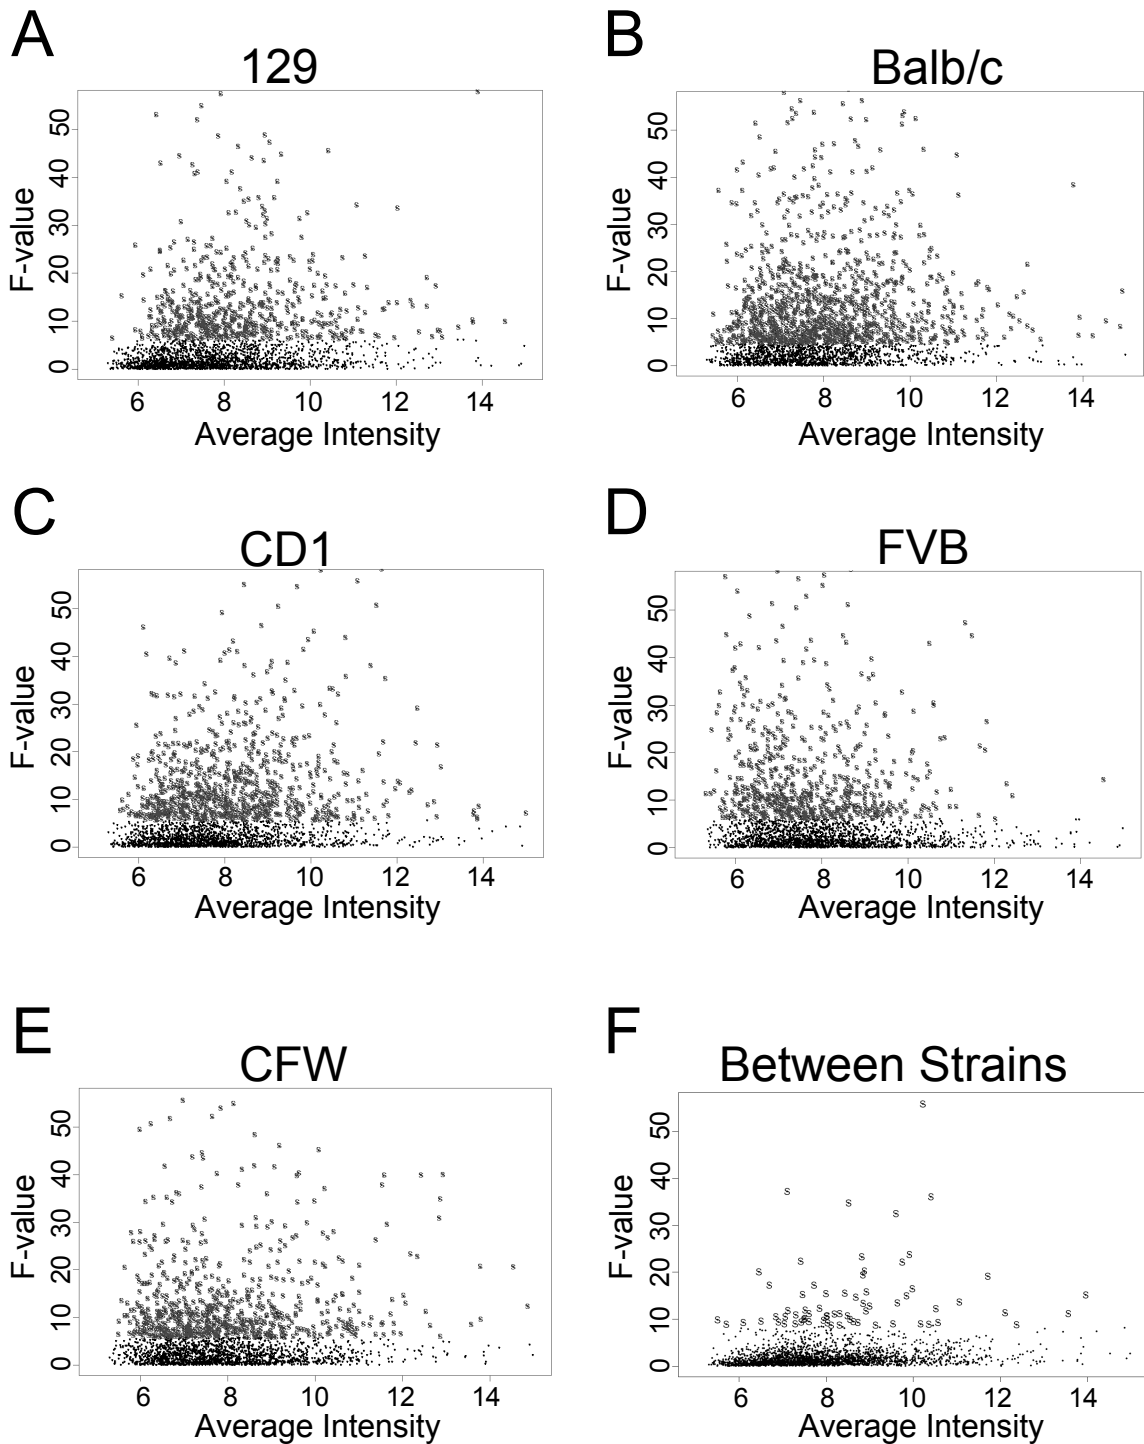

**Supplemental Figure 1: F-values are independent of intensity.**

F-values are plotted versus the average  $\log_2(\text{intensity}_{\text{Cy3}} + \text{intensity}_{\text{Cy5}})$  for each of 2382 genes analyzed. Genes that were significant at pFDR of 10% are marked with an 'S'. Plots are shown for intra-strain analyses (A-E) and the inter-strain analysis (F). There is no obvious dependence of F-values on average intensity in either case.

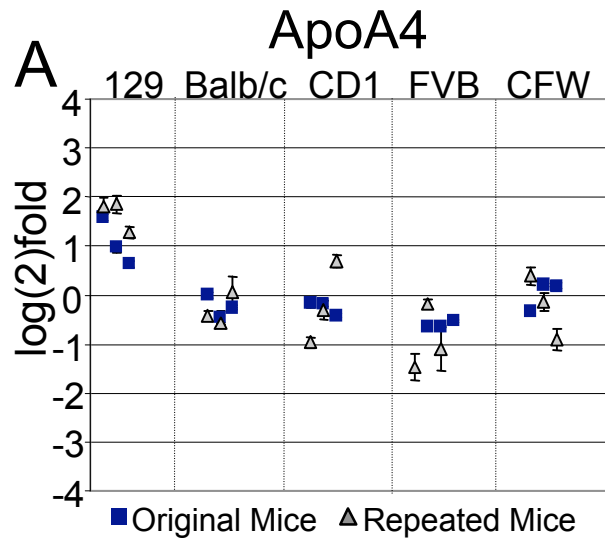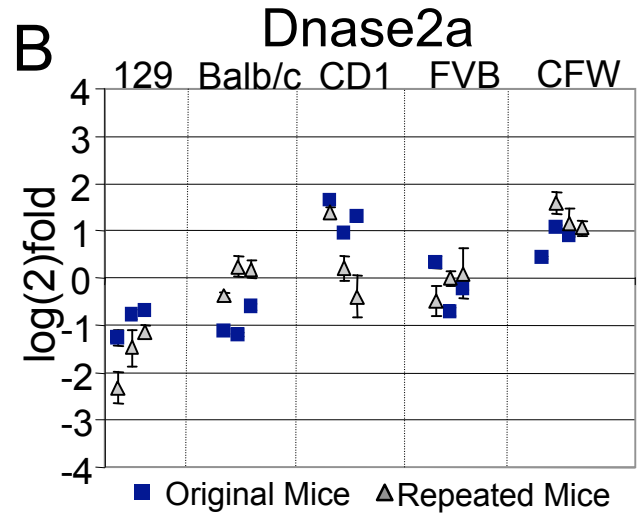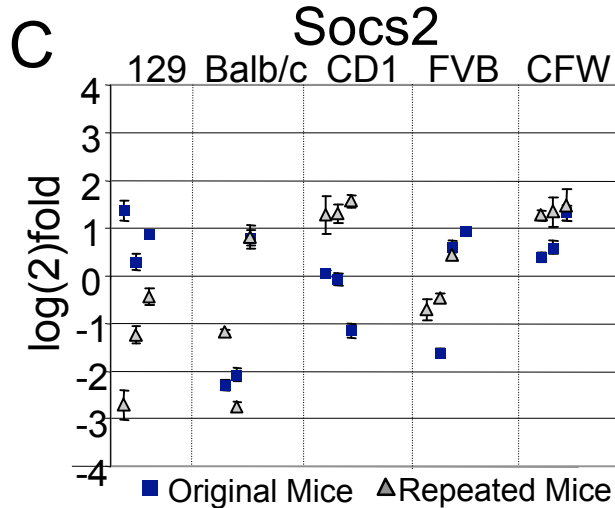

**Supplemental Figure 2. Quantitative RT-PCR analysis on repeated mice confirms the expression variability patterns of *ApoA4*, *Dnase2a*, and *Socs2*.** Quantitative RT-PCR measurements of *ApoA4*, *Dnase2a*, and *Socs2* transcript levels are depicted for both the original 3 mice used for the microarrays (blue squares) and three additional mice from each strain (gray triangles). Note that the data for *ApoA4* and *Dnase2a* from the original mice is the same as in Figure 1C, but presented in log<sub>2</sub> format. In the repeated mice four independent RNA preparations were isolated from each liver (total of 12 RNA preparations per strain). Error bars represent the standard deviation of transcript measurements from the 4 RNA preparations, or from 4 replicate PCR reactions in the case of the original mice (note that for some measurements, the error bars fall within the square).

## Density Plot of Variance for Array, Mouse, and Strain

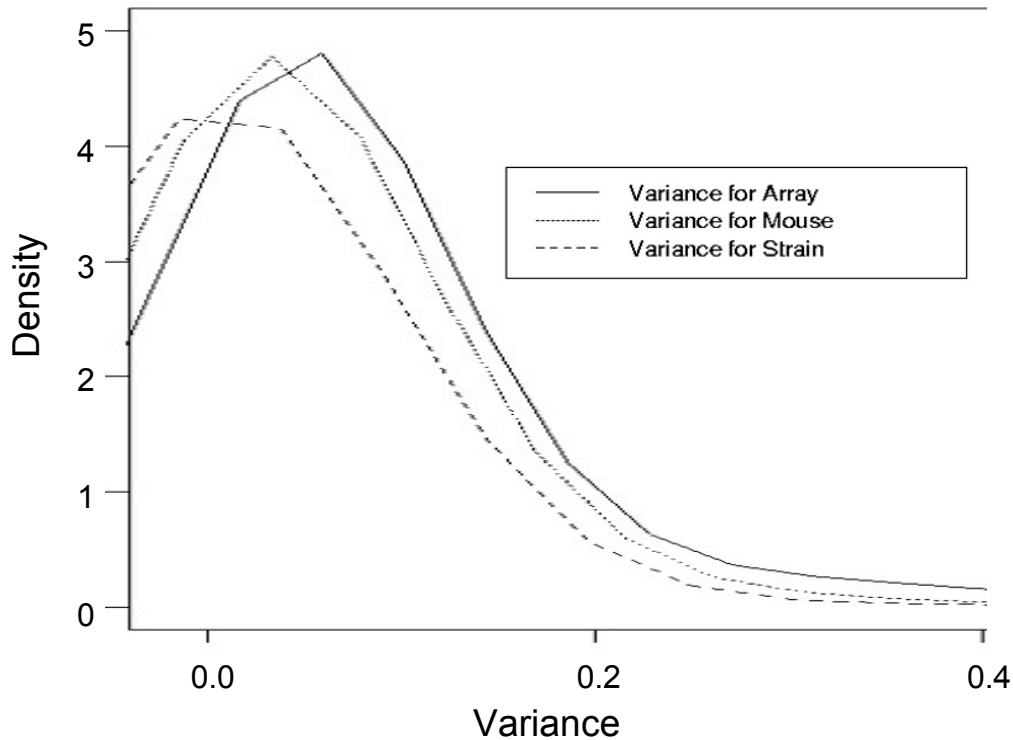

| All 2382 Genes | 129 | Balb | CD1 | FVB | CFW | Between Strains | Mean Array Fold Error |
|----------------|-----|------|-----|-----|-----|-----------------|-----------------------|
| >1.5 fold      | 366 | 458  | 545 | 406 | 459 | 423             | 588                   |
| >2.0 fold      | 86  | 77   | 79  | 91  | 124 | 79              | 129                   |
| >3.0 fold      | 15  | 12   | 9   | 10  | 22  | 18              | 8                     |

### Supplemental Figure 3: Comparison of variances associated with array, mouse, and strain.

At a pFDR of 10% we found that 1876 genes (79%) varied within strain, while 66 genes varied between strains (2.8%), using a single test. A very small array variance (technical error) might result in more statistically significant genes within strain than between strains, even when variance due to strain is higher than the variance within strain. To address this we have drawn a density plot of the variances associated with array, mouse (within strain), and mouse (between strain) for all 2382 genes. The plot shows that the mouse (within strain) variances are higher overall than the mouse (between strain) variances, while the array variance is the largest overall. The total number of genes achieving at least 1.5 fold, 2 fold, or 3 fold differences is also tabulated for all genes; within strain, between strain, and for mean array fold error. The mean array fold error was calculated as the average fold difference between the maximum and minimum values of the 4 arrays for each mouse across all 15 mice. The overall mean array fold error is greater than mouse or strain fold differences, emphasizing that technical variation is not small relative to mouse (within strain) and mouse (between strain) variation. This analysis is difficult to formally interpret, but it supports the conclusion that variation specific to strain is a small component of overall inter-individual variation.
